# Supplementary material for: Quantitive Assessment of Gustatory Function and Its Association with Demographics, and Systemic Morbidity
Source: MDPI journal article supplement (doi:10.3390/biology13010050), 2024-01-18
Supplement: s1 [file s1]

### Supplementary file

### Nonparametric tests for the different variables: Independent-Samples Mann-Whitney U Test, Kruskal Wallis and spearman's Rho

Table S1: Sex.

| Hypothesis Test Summary |                                                                             |                                         |      |                             |
|-------------------------|-----------------------------------------------------------------------------|-----------------------------------------|------|-----------------------------|
|                         | Null Hypothesis                                                             | Test                                    | Sig. | Decision                    |
| 1                       | The distribution of Sweet is the same across categories of Sex.             | Independent-Samples Mann-Whitney U Test | .019 | Reject the null hypothesis. |
| 2                       | The distribution of Sour is the same across categories of Sex.              | Independent-Samples Mann-Whitney U Test | .000 | Reject the null hypothesis. |
| 3                       | The distribution of Salty is the same across categories of Sex.             | Independent-Samples Mann-Whitney U Test | .000 | Reject the null hypothesis. |
| 4                       | The distribution of Bitter is the same across categories of Sex.            | Independent-Samples Mann-Whitney U Test | .000 | Reject the null hypothesis. |
| 5                       | The distribution of Total taste score is the same across categories of Sex. | Independent-Samples Mann-Whitney U Test | .000 | Reject the null hypothesis. |

Asymptotic significances are displayed. The significance level is .050.

Table S2: Hyposalivation

| Hypothesis Test Summary |                                                                                        |                                         |      |                             |
|-------------------------|----------------------------------------------------------------------------------------|-----------------------------------------|------|-----------------------------|
|                         | Null Hypothesis                                                                        | Test                                    | Sig. | Decision                    |
| 1                       | The distribution of Sweet is the same across categories of Hyposalivation.             | Independent-Samples Mann-Whitney U Test | .044 | Reject the null hypothesis. |
| 2                       | The distribution of Sour is the same across categories of Hyposalivation.              | Independent-Samples Mann-Whitney U Test | .412 | Retain the null hypothesis. |
| 3                       | The distribution of Salty is the same across categories of Hyposalivation.             | Independent-Samples Mann-Whitney U Test | .616 | Retain the null hypothesis. |
| 4                       | The distribution of Bitter is the same across categories of Hyposalivation.            | Independent-Samples Mann-Whitney U Test | .987 | Retain the null hypothesis. |
| 5                       | The distribution of Total taste score is the same across categories of Hyposalivation. | Independent-Samples Mann-Whitney U Test | .310 | Retain the null hypothesis. |

Asymptotic significances are displayed. The significance level is .050.

**Table S3: BMS**

| <b>Hypothesis Test Summary</b> |                                                                                                      |                                         |             |                             |
|--------------------------------|------------------------------------------------------------------------------------------------------|-----------------------------------------|-------------|-----------------------------|
|                                | <b>Null Hypothesis</b>                                                                               | <b>Test</b>                             | <b>Sig.</b> | <b>Decision</b>             |
| 1                              | The distribution of Sweet is the same across categories of Burning mouth syndrome (BMS).             | Independent-Samples Mann-Whitney U Test | .385        | Retain the null hypothesis. |
| 2                              | The distribution of Sour is the same across categories of Burning mouth syndrome (BMS).              | Independent-Samples Mann-Whitney U Test | .180        | Retain the null hypothesis. |
| 3                              | The distribution of Salty is the same across categories of Burning mouth syndrome (BMS).             | Independent-Samples Mann-Whitney U Test | .009        | Reject the null hypothesis. |
| 4                              | The distribution of Bitter is the same across categories of Burning mouth syndrome (BMS).            | Independent-Samples Mann-Whitney U Test | .170        | Retain the null hypothesis. |
| 5                              | The distribution of Total taste score is the same across categories of Burning mouth syndrome (BMS). | Independent-Samples Mann-Whitney U Test | .032        | Reject the null hypothesis. |

Asymptotic significances are displayed. The significance level is .050.

**Table S4: Major trauma**

| <b>Hypothesis Test Summary</b> |                                                                                      |                                         |             |                             |
|--------------------------------|--------------------------------------------------------------------------------------|-----------------------------------------|-------------|-----------------------------|
|                                | <b>Null Hypothesis</b>                                                               | <b>Test</b>                             | <b>Sig.</b> | <b>Decision</b>             |
| 1                              | The distribution of Sweet is the same across categories of Major trauma.             | Independent-Samples Mann-Whitney U Test | .001        | Reject the null hypothesis. |
| 2                              | The distribution of Sour is the same across categories of Major trauma.              | Independent-Samples Mann-Whitney U Test | .001        | Reject the null hypothesis. |
| 3                              | The distribution of Salty is the same across categories of Major trauma.             | Independent-Samples Mann-Whitney U Test | .004        | Reject the null hypothesis. |
| 4                              | The distribution of Bitter is the same across categories of Major trauma.            | Independent-Samples Mann-Whitney U Test | .000        | Reject the null hypothesis. |
| 5                              | The distribution of Total taste score is the same across categories of Major trauma. | Independent-Samples Mann-Whitney U Test | .000        | Reject the null hypothesis. |

Asymptotic significances are displayed. The significance level is .050.

**Table S5: Minor trauma:****Hypothesis Test Summary**

|   | Null Hypothesis                                                                      | Test                                    | Sig. | Decision                    |
|---|--------------------------------------------------------------------------------------|-----------------------------------------|------|-----------------------------|
| 1 | The distribution of Sweet is the same across categories of Minor trauma.             | Independent-Samples Mann-Whitney U Test | .132 | Retain the null hypothesis. |
| 2 | The distribution of Sour is the same across categories of Minor trauma.              | Independent-Samples Mann-Whitney U Test | .775 | Retain the null hypothesis. |
| 3 | The distribution of Salty is the same across categories of Minor trauma.             | Independent-Samples Mann-Whitney U Test | .209 | Retain the null hypothesis. |
| 4 | The distribution of Bitter is the same across categories of Minor trauma.            | Independent-Samples Mann-Whitney U Test | .644 | Retain the null hypothesis. |
| 5 | The distribution of Total taste score is the same across categories of Minor trauma. | Independent-Samples Mann-Whitney U Test | .481 | Retain the null hypothesis. |

Asymptotic significances are displayed. The significance level is .050.

**Table S6: Zinc deficiency****Hypothesis Test Summary**

|   | Null Hypothesis                                                                         | Test                                    | Sig. | Decision                    |
|---|-----------------------------------------------------------------------------------------|-----------------------------------------|------|-----------------------------|
| 1 | The distribution of Sweet is the same across categories of Zinc deficiency.             | Independent-Samples Mann-Whitney U Test | .018 | Reject the null hypothesis. |
| 2 | The distribution of Sour is the same across categories of Zinc deficiency.              | Independent-Samples Mann-Whitney U Test | .119 | Retain the null hypothesis. |
| 3 | The distribution of Salty is the same across categories of Zinc deficiency.             | Independent-Samples Mann-Whitney U Test | .023 | Reject the null hypothesis. |
| 4 | The distribution of Bitter is the same across categories of Zinc deficiency.            | Independent-Samples Mann-Whitney U Test | .158 | Retain the null hypothesis. |
| 5 | The distribution of Total taste score is the same across categories of Zinc deficiency. | Independent-Samples Mann-Whitney U Test | .023 | Reject the null hypothesis. |

Asymptotic significances are displayed. The significance level is .050.

**Table S7: Exposure to toxic chemicals**

**Hypothesis Test Summary**

|   | Null Hypothesis                                                                                     | Test                                    | Sig. | Decision                    |
|---|-----------------------------------------------------------------------------------------------------|-----------------------------------------|------|-----------------------------|
| 1 | The distribution of Sweet is the same across categories of Exposure to toxic chemicals.             | Independent-Samples Mann-Whitney U Test | .584 | Retain the null hypothesis. |
| 2 | The distribution of Sour is the same across categories of Exposure to toxic chemicals.              | Independent-Samples Mann-Whitney U Test | .144 | Retain the null hypothesis. |
| 3 | The distribution of Salty is the same across categories of Exposure to toxic chemicals.             | Independent-Samples Mann-Whitney U Test | .022 | Reject the null hypothesis. |
| 4 | The distribution of Bitter is the same across categories of Exposure to toxic chemicals.            | Independent-Samples Mann-Whitney U Test | .177 | Retain the null hypothesis. |
| 5 | The distribution of Total taste score is the same across categories of Exposure to toxic chemicals. | Independent-Samples Mann-Whitney U Test | .073 | Retain the null hypothesis. |

Asymptotic significances are displayed. The significance level is .050.

**Table S8: S/P URTI****Hypothesis Test Summary**

|   | Null Hypothesis                                                                                                  | Test                                    | Sig. | Decision                    |
|---|------------------------------------------------------------------------------------------------------------------|-----------------------------------------|------|-----------------------------|
| 1 | The distribution of Sweet is the same across categories of Upper respiratory tract infection (URTI).             | Independent-Samples Mann-Whitney U Test | .022 | Reject the null hypothesis. |
| 2 | The distribution of Sour is the same across categories of Upper respiratory tract infection (URTI).              | Independent-Samples Mann-Whitney U Test | .027 | Reject the null hypothesis. |
| 3 | The distribution of Salty is the same across categories of Upper respiratory tract infection (URTI).             | Independent-Samples Mann-Whitney U Test | .002 | Reject the null hypothesis. |
| 4 | The distribution of Bitter is the same across categories of Upper respiratory tract infection (URTI).            | Independent-Samples Mann-Whitney U Test | .049 | Reject the null hypothesis. |
| 5 | The distribution of Total taste score is the same across categories of Upper respiratory tract infection (URTI). | Independent-Samples Mann-Whitney U Test | .003 | Reject the null hypothesis. |

Asymptotic significances are displayed. The significance level is .050.

**Table S9: Gastrointestinal disease****Hypothesis Test Summary**

|   | Null Hypothesis                                                                                  | Test                                    | Sig. | Decision                    |
|---|--------------------------------------------------------------------------------------------------|-----------------------------------------|------|-----------------------------|
| 1 | The distribution of Sweet is the same across categories of Gastrointestinal disease .            | Independent-Samples Mann-Whitney U Test | .351 | Retain the null hypothesis. |
| 2 | The distribution of Sour is the same across categories of Gastrointestinal disease .             | Independent-Samples Mann-Whitney U Test | .955 | Retain the null hypothesis. |
| 3 | The distribution of Salty is the same across categories of Gastrointestinal disease .            | Independent-Samples Mann-Whitney U Test | .026 | Reject the null hypothesis. |
| 4 | The distribution of Bitter is the same across categories of Gastrointestinal disease.            | Independent-Samples Mann-Whitney U Test | .128 | Retain the null hypothesis. |
| 5 | The distribution of Total taste score is the same across categories of Gastrointestinal disease. | Independent-Samples Mann-Whitney U Test | .087 | Retain the null hypothesis. |

Asymptotic significances are displayed. The significance level is .050.

**Table S10: Kidney disease****Hypothesis Test Summary**

|   | Null Hypothesis                                                                        | Test                                    | Sig. | Decision                    |
|---|----------------------------------------------------------------------------------------|-----------------------------------------|------|-----------------------------|
| 1 | The distribution of Sweet is the same across categories of Kidney disease.             | Independent-Samples Mann-Whitney U Test | .825 | Retain the null hypothesis. |
| 2 | The distribution of Sour is the same across categories of Kidney disease.              | Independent-Samples Mann-Whitney U Test | .802 | Retain the null hypothesis. |
| 3 | The distribution of Salty is the same across categories of Kidney disease.             | Independent-Samples Mann-Whitney U Test | .695 | Retain the null hypothesis. |
| 4 | The distribution of Bitter is the same across categories of Kidney disease.            | Independent-Samples Mann-Whitney U Test | .041 | Reject the null hypothesis. |
| 5 | The distribution of Total taste score is the same across categories of Kidney disease. | Independent-Samples Mann-Whitney U Test | .560 | Retain the null hypothesis. |

Asymptotic significances are displayed. The significance level is .050.

**Table S11: Obesity:****Hypothesis Test Summary**

|   | Null Hypothesis                                                                 | Test                                    | Sig. | Decision                    |
|---|---------------------------------------------------------------------------------|-----------------------------------------|------|-----------------------------|
| 1 | The distribution of Sweet is the same across categories of Obesity.             | Independent-Samples Mann-Whitney U Test | .970 | Retain the null hypothesis. |
| 2 | The distribution of Sour is the same across categories of Obesity.              | Independent-Samples Mann-Whitney U Test | .399 | Retain the null hypothesis. |
| 3 | The distribution of Salty is the same across categories of Obesity.             | Independent-Samples Mann-Whitney U Test | .997 | Retain the null hypothesis. |
| 4 | The distribution of Bitter is the same across categories of Obesity.            | Independent-Samples Mann-Whitney U Test | .036 | Reject the null hypothesis. |
| 5 | The distribution of Total taste score is the same across categories of Obesity. | Independent-Samples Mann-Whitney U Test | .699 | Retain the null hypothesis. |

Asymptotic significances are displayed. The significance level is .050.

**Table S12: Immune-related disease****Hypothesis Test Summary**

|   | Null Hypothesis                                                                                 | Test                                    | Sig. | Decision                    |
|---|-------------------------------------------------------------------------------------------------|-----------------------------------------|------|-----------------------------|
| 1 | The distribution of Sweet is the same across categories of Immune-related disease.              | Independent-Samples Mann-Whitney U Test | .036 | Reject the null hypothesis. |
| 2 | The distribution of Sour is the same across categories of Immune-related diseases.              | Independent-Samples Mann-Whitney U Test | .548 | Retain the null hypothesis. |
| 3 | The distribution of Salty is the same across categories of Immune-related diseases.             | Independent-Samples Mann-Whitney U Test | .463 | Retain the null hypothesis. |
| 4 | The distribution of Bitter is the same across categories of Immune-related disease.             | Independent-Samples Mann-Whitney U Test | .471 | Retain the null hypothesis. |
| 5 | The distribution of Total taste score is the same across categories of Immune-related diseases. | Independent-Samples Mann-Whitney U Test | .270 | Retain the null hypothesis. |

Asymptotic significances are displayed. The significance level is .050.

**Table S13: Current chemotherapy****Hypothesis Test Summary**

|   | Null Hypothesis                                                                                        | Test                                    | Sig. | Decision                    |
|---|--------------------------------------------------------------------------------------------------------|-----------------------------------------|------|-----------------------------|
| 1 | The distribution of Sweet is the same across categories of Current chemotherapy treatment.             | Independent-Samples Mann-Whitney U Test | .049 | Reject the null hypothesis. |
| 2 | The distribution of Sour is the same across categories of Current chemotherapy treatment.              | Independent-Samples Mann-Whitney U Test | .023 | Reject the null hypothesis. |
| 3 | The distribution of salt is the same across categories of Current chemotherapy treatment.              | Independent-Samples Mann-Whitney U Test | .009 | Reject the null hypothesis. |
| 4 | The distribution of Bitter is the same across categories of Current chemotherapy treatment.            | Independent-Samples Mann-Whitney U Test | .009 | Reject the null hypothesis. |
| 5 | The distribution of Total taste score is the same across categories of Current chemotherapy treatment. | Independent-Samples Mann-Whitney U Test | .005 | Reject the null hypothesis. |

Asymptotic significances are displayed. The significance level is .050.
